# Supplementary material for: Host Resistance, Population Structure and the Long-Term Persistence of Bubonic Plague: Contributions of a Modelling Approach in the Malagasy Focus
Source: PLOS journal article supplement (doi:10.1371/journal.pcbi.1003039), 2013-05-09
Supplement: S13 (10.1371/journal.pcbi.1003039.s013) [file journal.pcbi.1003039.s013]

**Text S2. Calculation of the propagation threshold by the Next Generation Approach.**

The Next Generation Approach [1] is used to calculate the basic reproductive number of the disease,  $R_0$ . This method defines  $R_0$  as the dominant eigenvalue of the Next Generation Operator. The Jacobian matrix of the variables transmitting the disease is evaluated at the disease extinction point and written as  $J = M - D$ , where  $M$  corresponds to the events where infectious individuals appear and  $D$  to the events where infectious individuals disappear ( $M \geq 0$  and  $D$  a diagonal matrix  $> 0$ ). The dominant eigenvalue of the matrix  $MD^{-1}$  corresponds to the number  $R_0$ .

The individuals which carry the disease are the infectious rats  $I$  and the free infectious fleas  $F$ . We consider  $\frac{dI}{dt} = g$  and  $\frac{dF}{dt} = f$ . The Jacobian matrix we study is:

$$J = \begin{pmatrix} \frac{dg}{dI} & \frac{dg}{dF} \\ \frac{df}{dI} & \frac{df}{dF} \end{pmatrix} = \begin{pmatrix} -(d+m) & \beta \frac{S}{S+I+R} (1 - e^{-a(S+I+R)}) \\ N(d+m) & -d_f - (1 - e^{-a(S+I+R)}) \end{pmatrix} \quad (1)$$

The Jacobian matrix evaluated in ( $S^* = K$ ,  $I^* = 0$ ,  $R^* = 0$ ,  $N^* = K_f$ ,  $F^* = 0$ ) is:

$$J^* = \begin{pmatrix} -(d+m) & \beta(1 - e^{-aK}) \\ K_f(d+m) & -d_f - (1 - e^{-aK}) \end{pmatrix} \quad (2)$$

$$= \begin{pmatrix} 0 & \beta(1 - e^{-aK}) \\ K_f(d+m) & 0 \end{pmatrix} - \begin{pmatrix} (d+m) & 0 \\ 0 & d_f + (1 - e^{-aK}) \end{pmatrix} \quad (3)$$

$J^*$  can thus be written as (M - D).

$$MD^{-1} = \begin{pmatrix} 0 & \frac{\beta(1 - e^{-aK})}{d_f + (1 - e^{-aK})} \\ K_f & 0 \end{pmatrix} \quad (4)$$

The eigenvalues of  $MD^{-1}$  are  $\pm \sqrt{\frac{\beta K_f}{1 + \frac{d_f}{1 - e^{-aK}}}}$ .

Therefore,

$$\rho(MD^{-1}) = R_0 = \sqrt{\frac{\beta K_f}{1 + \frac{d_f}{1 - e^{-aK}}}} \quad (5)$$

## References

1. Diekmann O, Heesterbeek J (2000) Mathematical epidemiology of infectious diseases: model building, analysis and interpretation. Chichester: John Wiley.
